# Supplementary material
Source: Springer Nature journal article supplement (https://www.springermedizin.de/resource/supplementary/12947_2009_304_MOESM10_ESM.pdf/9556658)
Supplement: MOESM10 [file 9556658]

Mild-to moderate  
FMR

Compensated  
asymptomatic

- Unexplained dyspnea  
- Nonischemic PE

Clinical and  
echocardiographic  
follow-up

ERO decrease or  
< 13 mm<sup>2</sup>  
increase

ERO increase  
> 13 mm<sup>2</sup>

Revascularization  
indicated

Revascularization  
not indicated

Combined bypass  
and mitral surgery

Consider cardiac  
resynchronization
